# Supplementary material for: Peptide-induced chirality transfer and circularly polarized luminescence in achiral BODIPY emitters via halogen bonding
Source: Royal Society of Chemistry journal article supplement (doi:10.1039/d4cc05814c), 2024-12-04
Supplement: d4cc05814c1.pdf [file d4cc05814c1.pdf]

Supporting Information

For

**Peptide-Induced Chirality Transfer and Circularly Polarized Luminescence in Achiral BODIPY Emitters via Halogen Bonding**

Soumyadip Show,<sup>a</sup> Akshoy Jamadar,<sup>a</sup> Sudip Gorai,<sup>b,c</sup> Soumyaditya Mula<sup>b,c</sup> and

Anindita Das<sup>\*a</sup>

Corresponding author's email: [psuad2@iacs.res.in](mailto:psuad2@iacs.res.in)

<sup>a</sup>School of Applied and Interdisciplinary Sciences, Indian Association for the Cultivation of Science (IACS), 2A and 2B Raja S. C. Mullick Road, Jadavpur, Kolkata 700032, INDIA.

<sup>b</sup>Bio-Organic Division, Bhabha Atomic Research Centre, Mumbai 400085, INDIA.

<sup>c</sup>Homi Bhabha National Institute, Anushakti Nagar, Mumbai 400094, INDIA.

|                                | Page No. |
|--------------------------------|----------|
| Materials and Methods          | 2-4      |
| Synthesis and Characterization | 4-8      |
| Additional Figures             | 9-14     |
| NMR and HRMS Spectra           | 15-21    |
| References                     | 22       |

## Materials and Methods:

**Chemicals and Reagents:** All reagents and solvents were purchased from available commercial suppliers and further purified following standard procedures. All solvents were purified and dried before use following standard protocols. Spectroscopic-grade solvents were used for physical studies.

**NMR spectroscopy:**  $^1\text{H}$  NMR,  $^{13}\text{C}$  NMR,  $^{11}\text{B}$  NMR and  $^{19}\text{F}$  NMR spectra were obtained using Bruker 600 MHz and 400 MHz NMR spectrometers, with  $\text{CDCl}_3$ ,  $\text{DMSO-D}_6$  and  $\text{D}_2\text{O}$  as solvents. Chemical shifts ( $\delta$ ) are reported in parts per million (ppm) with tetramethylsilane (TMS) as the internal standard. Coupling constants ( $J$ ) are given in hertz (Hz). For  $^{11}\text{B}$  NMR spectroscopy, phenylboronic acid was used as an internal standard. Proton signal multiplicities are denoted as follows: singlet (s), doublet (d), triplet (t), quadruplet (q), and multiplet (m).

**Mass spectrometry:** For determination of mass of the synthesized compounds, an electron spray ionization (ESI) QTOF mass spectrometer was used.

**UV-Vis spectroscopy:** UV/Vis absorption spectra were measured using a JASCO V-750 spectrophotometer. The spectral bandwidth was maintained at 1.0 nm, and a scan rate of 500 nm per minute was used. The experiments were conducted in quartz cuvettes with optical path lengths of 10 mm or 2 mm. For variable-temperature UV/Vis studies, samples were taken in stoppered cuvettes and heated from 25 °C to 95 °C. The UV/Vis spectra were recorded at a 5 °C interval and every time the samples, allowing the samples to equilibrate for 2 mins after reaching the desired temperature each time. The melting curves were obtained by plotting the  $\alpha_{\text{aggregate}}$  vs. temperature plots. Using the following equation, the  $\alpha_{\text{aggregate}}$  was determined,

$$\alpha_{\text{agg}}(T) \approx \frac{A(T) - A_{\text{mono}}}{A_{\text{agg}} - A_{\text{mono}}}$$

where  $A_{\text{agg}}$ ,  $A_{\text{mono}}$ , and  $A(T)$  are the absorbance values at a particular wavelength in the UV/Vis spectra for the fully aggregated, monomeric, and in-between state at temperature  $T$ , respectively.

**Fluorescence spectroscopy:** Fluorescence spectra were recorded on a FluoroMax-3 spectrophotometer, from Horiba Jobin Yvon. The experiments were conducted in quartz cuvettes with optical path lengths of 10 mm.

**Quantum Yield measurements:** The samples for **A<sub>1</sub>**, **A<sub>2</sub>**, **D<sub>1</sub>-A<sub>1</sub>**, and **D<sub>1</sub>-A<sub>2</sub>** were prepared based on the previously mentioned method keeping the dye concentration fixed at 0.05 mM in 10% MeOH/water, and their relative quantum yields were determined using Rhodamine 6G as the reference in H<sub>2</sub>O, whose quantum yield is reported.<sup>1,2</sup> The emission intensity measurements were performed using a 10 mm path length quartz cuvette. The excitation wavelength ( $\lambda_{\text{ex}}$ ) was adjusted to 400 nm for the BODIPY homo-assemblies and co-assemblies, while for Rhodamine 6G, the excitation wavelength ( $\lambda_{\text{ex}}$ ) was fixed at 526 nm. The excitation and emission bandwidths were maintained at 1 nm each in all the measurements. The measurements followed a literature protocol using the equation provided:<sup>3</sup>

$$Q_S = Q_R \times \frac{I_S}{I_R} \times \frac{A_R}{A_S} \times \left(\frac{\eta_S}{\eta_R}\right)^2$$

$Q_S$  = quantum yield of the sample;  $Q_R$  = quantum yield of the reference;  $I_S$  = area under PL curve of the sample;  $I_R$  = area under PL curve of reference;  $A_R$  = absorbance of the reference;  $A_S$  = absorbance of the sample;  $\eta_S$  = refractive index of 10% MeOH/water = 1.332;  $\eta_R$  = refractive index of water = 1.333.<sup>4</sup> The concentration of Rhodamine 6G was adjusted so that its absorbance was below 0.1 under the experimental condition.

**CD spectroscopy:** Circular dichroism experiments were carried out using a JASCO J-815 Circular Dichroism (CD) Spectropolarimeter. For the variable-temperature CD experiment, the samples were taken in a stoppered cuvette and heated from 25 °C to 95 °C. The CD spectra were recorded at 5 °C intervals, allowing the samples to equilibrate for 2 mins after reaching the desired temperature each time. The melting curve was obtained by plotting the CD magnitude at a fixed wavelength vs. temperature.

**CPL Spectroscopy:** Circular polarized luminescence (CPL) measurements carried out in a JASCO CPL-300 Spectrometer. The instrument was equipped with a Peltier cell for temperature-dependent measurements. The data were collected in quartz cuvettes with optical path lengths of 2 mm, a DC voltage of 850 V, aperture of 40/40 nm, and a scanning rate of 200 nm/min.

**FTIR spectroscopy:** FTIR studies were carried out using a PerkinElmer Spectrum 100 FT-IR spectrometer. The samples were prepared by drop-casting the concentrated solutions of **D<sub>1</sub>** and its co-assemblies with **A<sub>1</sub>** and **A<sub>2</sub>**. The samples were slowly evaporated by air-drying overnight to obtain a thin film. The sample was subsequently scratched from the slide, and solid-state

FTIR measurements were performed using a KBr pellet in transmittance mode over a scan range of 4000-400  $\text{cm}^{-1}$ .

**TEM Imaging:** Transmission Electron Microscopy (TEM) images were taken in a JEOL-2010EX machine with an accelerating voltage of 200 kV. The aggregated samples were drop-cast on TEM grids, typically made of copper, and air-dried overnight prior to the measurements.

### **Sample preparation**

A stock solution of the peptides and the BODIPY dyes was prepared at a higher concentration of 1 mM in chloroform. 100  $\mu\text{L}$  of **D<sub>1</sub>** in chloroform was taken in a vial, and the solvent was evaporated by heating with a heat gun. The resulting film was re-dissolved in 100  $\mu\text{L}$  of MeOH. To this, water (900  $\mu\text{L}$ ) was added to make a final concentration of 0.1 mM in 10% MeOH/H<sub>2</sub>O mixture. In a similar way, the aggregated samples of the two BODIPY dyes (**A<sub>1</sub>** and **A<sub>2</sub>**) and the control peptide, **D<sub>2</sub>**, were prepared. For the 1:1 co-assembly study, 100  $\mu\text{L}$  of **D<sub>1</sub>** and 100  $\mu\text{L}$  of **A<sub>1</sub>** in chloroform were mixed together in a small glass vial. The solvent was slowly evaporated by heating with a heat gun. The resulting film was redissolved in 100  $\mu\text{L}$  of MeOH, followed by the addition of 900  $\mu\text{L}$  of water to achieve a final concentration of 0.1 mM for both **D<sub>1</sub>** and **A<sub>1</sub>**. A clear, transparent solution was obtained, which was allowed to stand at room temperature for at least 2 hours to reach equilibrium before conducting any physical measurements. This procedure was similarly followed for preparing **D<sub>1</sub>-A<sub>2</sub>** co-assembly and also for studying the co-assembly of **A<sub>1</sub>** and **A<sub>2</sub>** with the control peptide donor, **D<sub>2</sub>**.

### **Synthesis and Characterization:**

**Synthesis of BODIPYs A<sub>1</sub> and A<sub>2</sub>:** BODIPYs **A<sub>1</sub>** and **A<sub>2</sub>** were synthesized as per the previously reported method.<sup>5</sup>

### **Synthesis of (2,3,5,6-tetrafluoro-4-iodophenyl)proline (Compound Pro-I)<sup>6</sup>**

A measured quantity of proline (8.68 mmol) and Cs<sub>2</sub>CO<sub>3</sub> (21.7 mmol) were taken in a sealed tube, to which 6 mL of pentafluoriodobenzene (34.72 mmol) was added, and then the reaction mixture was stirred at 120 °C for 7 days. The resulting solution was cooled to RT. The mixture was diluted with 20 mL water, and then extracted with DCM (3 × 20 mL). The organic layer was dried over Na<sub>2</sub>SO<sub>4</sub>, and concentrated under vacuum in rotary evaporator. Purification of the crude on a silica gel column chromatography using hexane/ethyl acetate as eluent furnished **Pro-I** as a pure amorphous white product. (Yield = 282 mg; ~10 %). The compound was characterized by <sup>1</sup>H NMR, <sup>13</sup>C NMR, <sup>19</sup>F NMR and HR-MS mass spectrometry analyses. <sup>1</sup>H NMR (400 MHz, Chloroform-*d*):  $\delta$  4.67 (td, 1 H, *J* = 5.6, 2.8), 3.91-3.82 (m, 1H), 3.64- 3.55

(m, 1H), 2.45-2.34 (m, 1H), 2.16 -2.05 (m, 1H), 2.05-1.87 (m, 2H);  $^{13}\text{C}$  NMR (151 MHz,  $\text{CDCl}_3$ ):  $\delta$  178.47, 148.60-146.76 (m, 2C), 140.13-138.23 (m, 2C), 127.33, 62.23, 52.38, 52.19, 30.75, 24.27;  $^{19}\text{F}$  NMR (565 MHz,  $\text{CDCl}_3$ , ppm):  $\delta$  -123.14 (d, 2F,  $J = 17.4$ ), -150.72 (d, 2F,  $J = 17.3$ ); HRMS  $m/z$  calculated for  $[\text{C}_{11}\text{H}_9\text{F}_4\text{INO}_2]$  i.e.  $[\text{M}+\text{H}]^+$ : 389.9614; experimentally found = 389.9616.

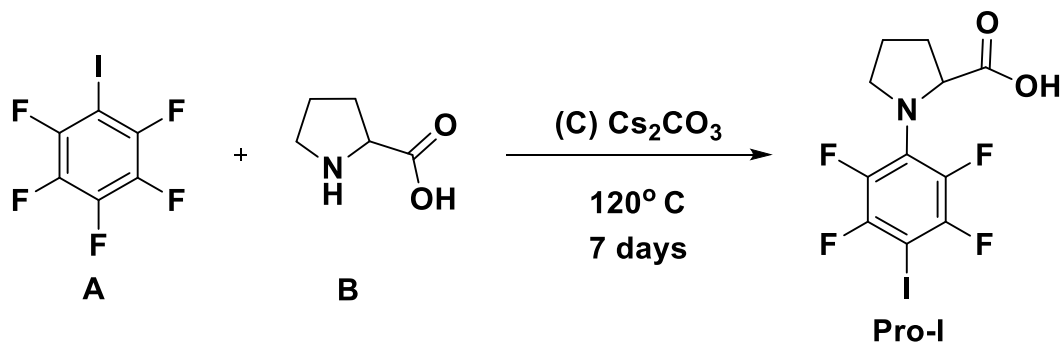

**Scheme S1:** Synthetic scheme for **Pro-I**.

### Synthesis of (perfluorophenyl)proline (Compound Pro-F)<sup>6</sup>

A measured quantity of proline (8.68 mmol) and  $\text{CsCO}_3$  (21.7 mmol) were taken in a sealed tube to which 6 mL pentafluoroiodobenzene (34.72 mmol) was added, and then the reaction mixture was stirred at  $120^\circ\text{C}$  for 10 days. The resulting solution was cooled to RT. The mixture was diluted with 20 mL water, then extracted with DCM ( $3 \times 20$  mL). The organic layer was dried over  $\text{Na}_2\text{SO}_4$ , and concentrated under vacuum in a rotary evaporator. Purification of the crude on a silica gel column chromatography using hexane/ethyl acetate as eluent furnished **Pro-F** as a brown sticky liquid (Yield = 212 mg; ~ 10 %). The compound was characterized by  $^1\text{H}$  NMR,  $^{13}\text{C}$  NMR,  $^{19}\text{F}$  NMR, and HR-MS mass spectrometry analyses.  $^1\text{H}$  NMR (400 MHz, Chloroform-*d*):  $\delta$  4.69 – 4.60 (m, 1H), 3.92 – 3.82 (m, 1H), 3.63-3.53 (m, 1H), 2.47- 2.35 (m, 1H), 2.18- 2.06 (m, 1H), 2.06-1.88 (m, 2H);  $^{13}\text{C}$  NMR (151 MHz,  $\text{CDCl}_3$ ):  $\delta$  177.45, 149.64-146.20 (m, 2C), 141.28-137.56 (m, 2C), 127.61, 62.48, 58.31, 52.78, 31.14, 24.71;  $^{19}\text{F}$  NMR (565 MHz, Chloroform-*d*):  $\delta$  -148.35 to -148.52 (m, 2F), -158.90 (t, 1F,  $J = 21.7$ ), -161.69 (td, 2F,  $J = 22.3, 5.6$ ); HRMS  $m/z$  calculated for  $[\text{C}_{11}\text{H}_9\text{F}_5\text{NO}_2]$  i.e.  $[\text{M}+\text{H}]^+$  : 282.0853; experimentally found: 282.0805.

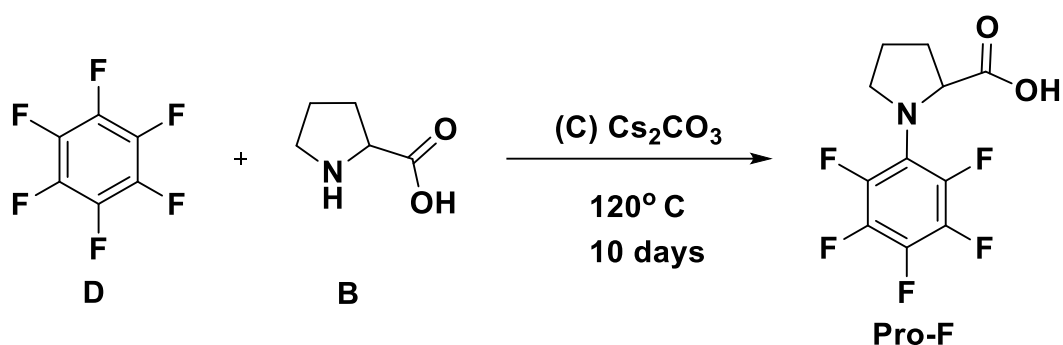

**Scheme S2:** Synthetic scheme for Pro-F.

**Solid-phase peptide synthesis:<sup>7</sup>**

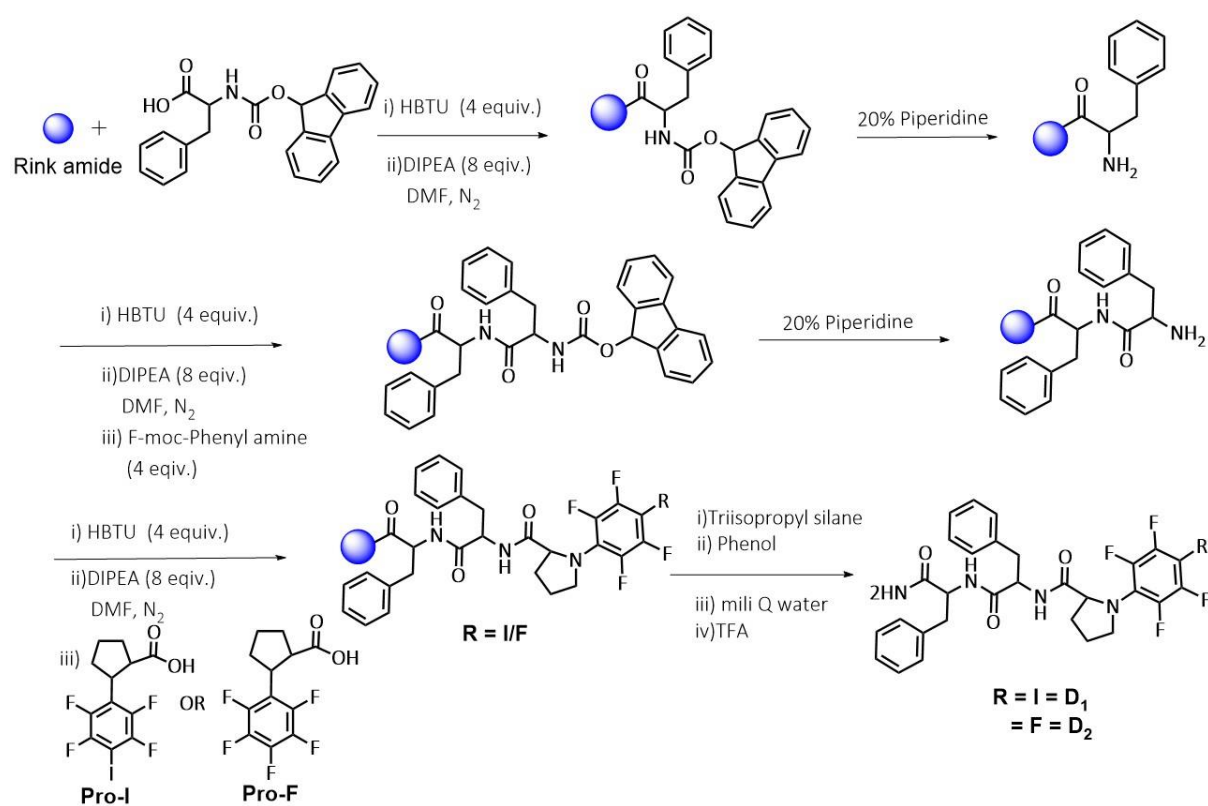

**Scheme S3:** Synthetic scheme for peptides  $\text{D}_1$  and  $\text{D}_2$ .

Peptides  $\text{D}_1$  and  $\text{D}_2$  were prepared following a solid-phase peptide synthesis technique that involved the sequential addition of amino acids from the C-terminus to the N-terminus. Fmoc-protected Rink amide resin was taken in a peptide synthesizer tube, and it served as the solid support. The following key steps were maintained for the complete synthesis of the two peptides,  $\text{D}_1$  and  $\text{D}_2$ :

1. Resin Swelling: The Rink amide resin was first swollen in DMF to increase its surface area and reactivity.

2. Fmoc Deprotection: The Fmoc (9-fluorenylmethyloxycarbonyl) group was cleaved from the resin-bound amino acid using piperidine as a base.

3. Amino Acid Coupling: In the next step, the second Fmoc-protected amino acid was activated using O-Benzotriazole-N,N,N',N'-tetramethyluronium-hexafluoro-phosphate (HBTU) and N,N-Diisopropylethylamine (DIPEA), and coupled to the deprotected amine of the amino acid bound to the resin.

4. Repetition: Steps 2 and 3 were repeated for the subsequent attachment of the proline derivative (**Pro-I** or **Pro-F**).

5. Final Deprotection and Cleavage: Once the tripeptide chain was prepared in the resin, the peptide was cleaved from the resin using a cleavage cocktail solution.

6. Purification: The peptide was finally purified using column chromatography in neutral alumina.

#### **Resin swelling:**

Protected Rink amide resin (0.3 g, 4.77 mmol) was allowed to swell in 10 mL of DMF overnight in a refrigerator. After swelling, the resin was transferred into a specialized apparatus equipped with a G-5 sintered bed. The solvent was then removed by suction using an oil-free piston pump.

#### **Deprotection of the Fmoc group:**

To the pre-swollen resin, 15 mL of 20% piperidine in DMF was added and stirred for 15 minutes under a nitrogen atmosphere. The solution was then drained, and the resin was washed twice with 10 mL of DMF under nitrogen. The deprotection process was repeated, followed by a thorough wash with DMF to ensure complete deprotection of the Fmoc group.

#### **General coupling procedure:**

Fmoc-amino acid (19 mmol, 4 eqv.) and HBTU (2 mmol, 4 eqv.) were dissolved in 10 mL of DMF, followed by the addition of DIPEA (38 mmol, 8 eqv.). This well-mixed solution was then added to the resin, and the mixture was stirred for two hours under a nitrogen atmosphere. Once the reaction was complete, the solution was drained, and the resin was washed alternately with DMF and DCM (4-6 times for 30 seconds each) under nitrogen. The Kaiser Test was performed following standard procedure, and the pale-yellow coloration indicated successful coupling. This cycle of deprotection, coupling, and washing was repeated until the desired

peptide was synthesized. After the final reaction with **Pro-I** / **Pro-F**, the solution was drained, and the resin was washed first with DMF and then with DCM. The peptidyl resin was thoroughly dried in preparation for the next process.

### **Cleavage:**

The purpose of cleavage is to separate the peptide from the solid support. For that, the peptidyl resin was treated with a cleavage cocktail solution that leads to a series of complex reactions. The cleavage cocktail used had the following combination: TFA/phenol/water/TIPS (88/5/5/2). This cocktail was added to the dried resin and stirred for 2 hours. After stirring, the solution was drained, and the resin was washed with the cocktail. The filtrate was collected in a conical flask and placed in a vacuum desiccator containing powdered KOH. After the solvent evaporated completely, the peptide was washed several times with cold ether. The crude peptide was then dissolved in distilled water-acetonitrile mixture (80/20) and lyophilized. The lyophilized peptide was purified by column chromatography using silica as the stationary phase and 20% DCM/MeOH as eluent to obtain the pure products, **D<sub>1</sub>** and **D<sub>2</sub>** as a white powder (yield = 90 mg, 13 % and 64 mg, 11 %, respectively). All the compounds were characterized by <sup>1</sup>H NMR, <sup>19</sup>F NMR, and HR-MS mass spectral analyses.

### Compound **D<sub>1</sub>**

<sup>1</sup>H NMR (600 MHz, DMSO-*d*<sub>6</sub>):  $\delta$  8.04 (d, 1H,  $J=8.4$ ), 7.93 (d, 1H,  $J=8.1$ ), 7.26 – 7.08 (10 H, m), 4.45 (tt, 3 H,  $J$  8.3, 4.0), 3.76 – 3.63 (m, 2 H), 3.47- 3.35 (m, 1 H), 3.01-2.91 (m, 2 H), 2.84-2.77 (m, 1H), 2.75-2.66 (m, 1H), 1.76-1.68 (m, 1H), 1.65-1.57 (m, 1H); <sup>19</sup>F NMR (565 MHz, DMSO-*d*<sub>6</sub>):  $\delta$  -125.06 (d,  $J = 19.6$ ), -150.43 (d,  $J = 18.4$ ); HRMS  $m/z$  calculated for [C<sub>29</sub>H<sub>27</sub>F<sub>4</sub>N<sub>1</sub>NaO<sub>3</sub>] i.e. [M+Na]<sup>+</sup>: 705.0692; experimentally found: 705.0632.

### Compound **D<sub>2</sub>**

<sup>1</sup>H NMR (400 MHz, Chloroform-*d*):  $\delta$  7.44 (d, 1H,  $J=6.6$ ), 7.33-7.29 (m, 2H), 7.27-7.23 (m, 1H), 7.22-7.17 (m, 4H), 7.16-7.12 (m, 2 H), 4.63 (q, 1H,  $J= 7.2$ ), 4.46 (m, 1H), 3.92 (1 H, dd,  $J= 9.3, 2.6$ ), 3.27-3.20 (m, 2H), 3.06-3.96 (m, 3 H), 3.90-3.84 (m, 1H), 3.28-3.18 (m, 1H), 1.97-1.92 (m, 1H), 1.85-1.71 (m, 1H); <sup>19</sup>F NMR (565 MHz, Chloroform-*d*):  $\delta$  -148.16 to -148.72 (m), -158.90 (t,  $J = 21.7$ ), -161.69 (td,  $J = 22.3, 5.6$ ); HRMS  $m/z$  calculated for [C<sub>29</sub>H<sub>27</sub>F<sub>5</sub>N<sub>4</sub>NaO<sub>3</sub>] i.e. [M+Na]<sup>+</sup>: 597.1901; experimentally found: 597.1734.



Additional Figures:

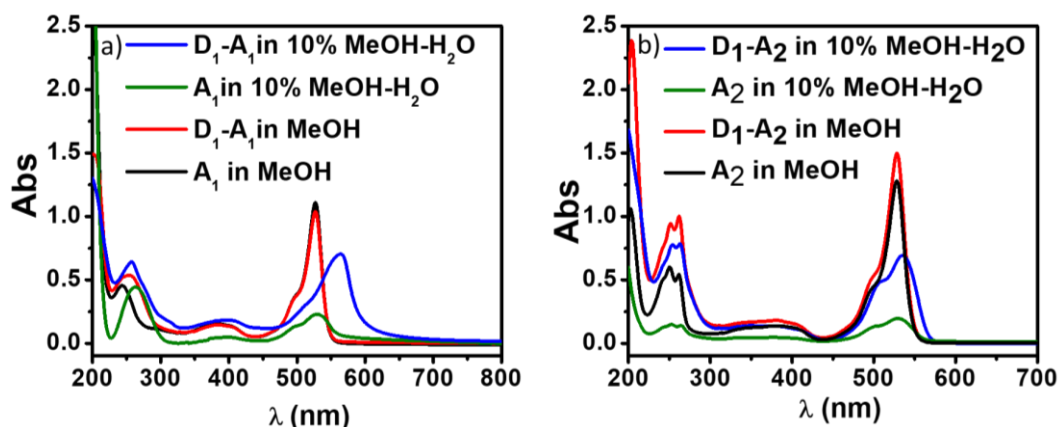

**Figure S1:** Compared UV-Vis absorption spectra of (a) A<sub>1</sub> and D<sub>1</sub>-A<sub>1</sub>, and (b) A<sub>2</sub> and D<sub>1</sub>-A<sub>2</sub> in MeOH and 10% MeOH-H<sub>2</sub>O mixture at 298 K. Individual Conc. = 0.1 mM.

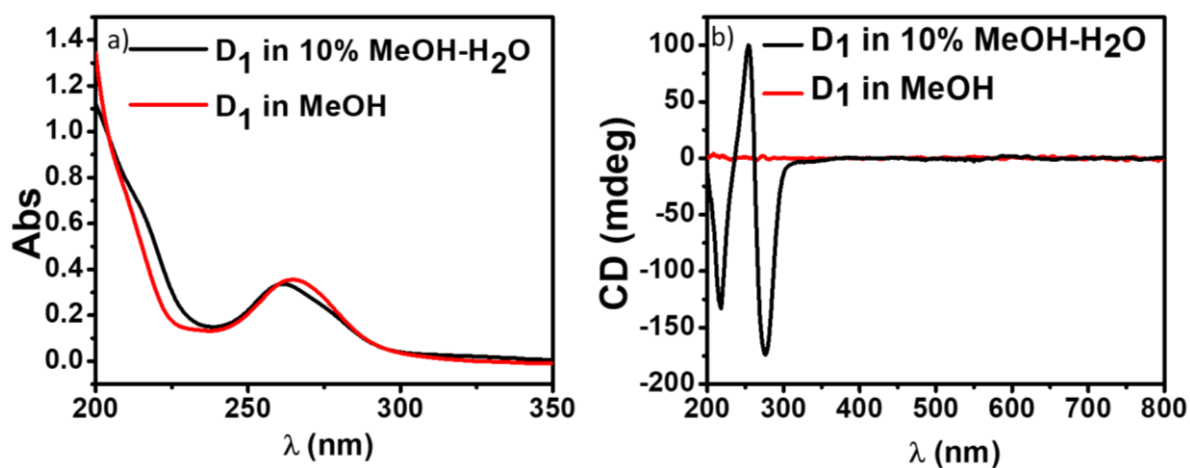

**Figure S2:** (a) UV-Vis absorption spectra and (b) CD spectra of D<sub>1</sub> in MeOH and 10% MeOH-H<sub>2</sub>O mixture at 298 K. Conc. = 0.1 mM.

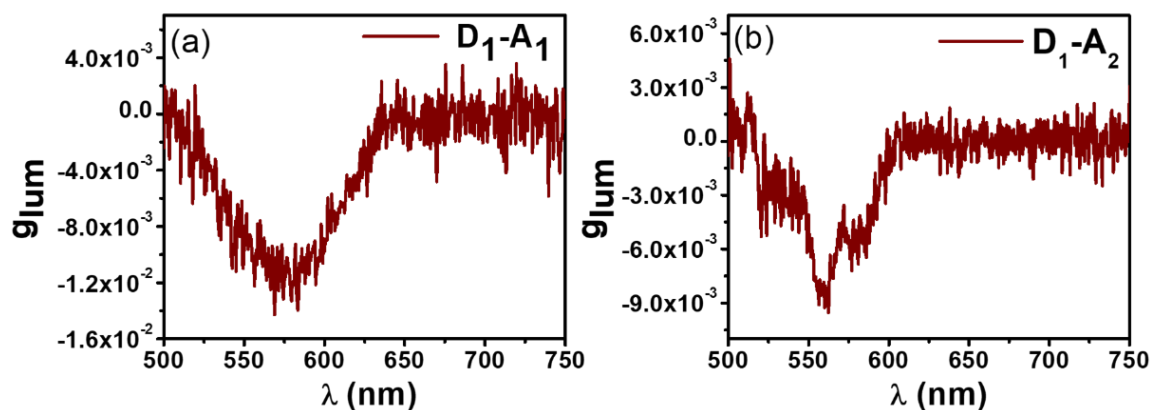

**Figure S3:** Luminescence dissymmetry factor ( $g_{lum}$ ) versus wavelength plot from CPL analysis for (a)  $D_1-A_1$  co-assembly, and (b)  $D_1-A_2$  co-assembly at 25 °C.

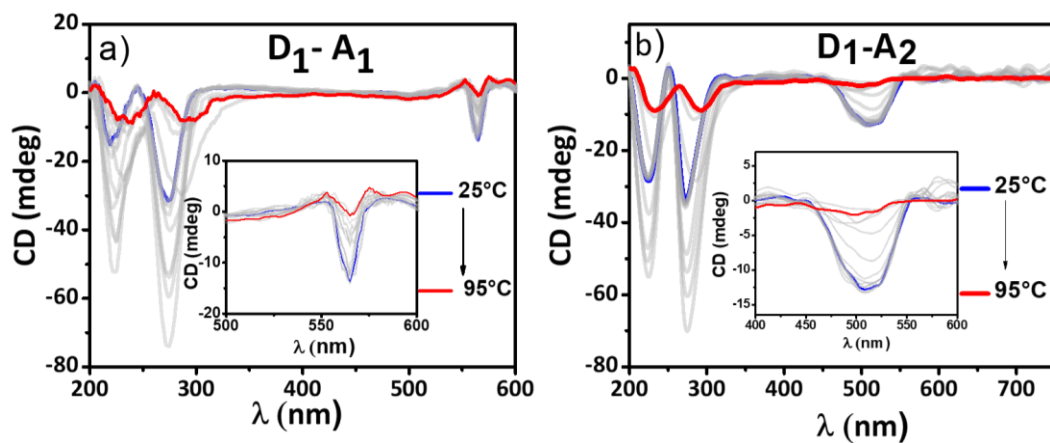

**Figure S4:** Variable-temperature CD spectra of (a)  $D_1-A_1$  co-assembly, and (b)  $D_1-A_2$  co-assembly. With increasing temperature, induced CD signals for  $A_1$  and  $A_2$  disappeared.

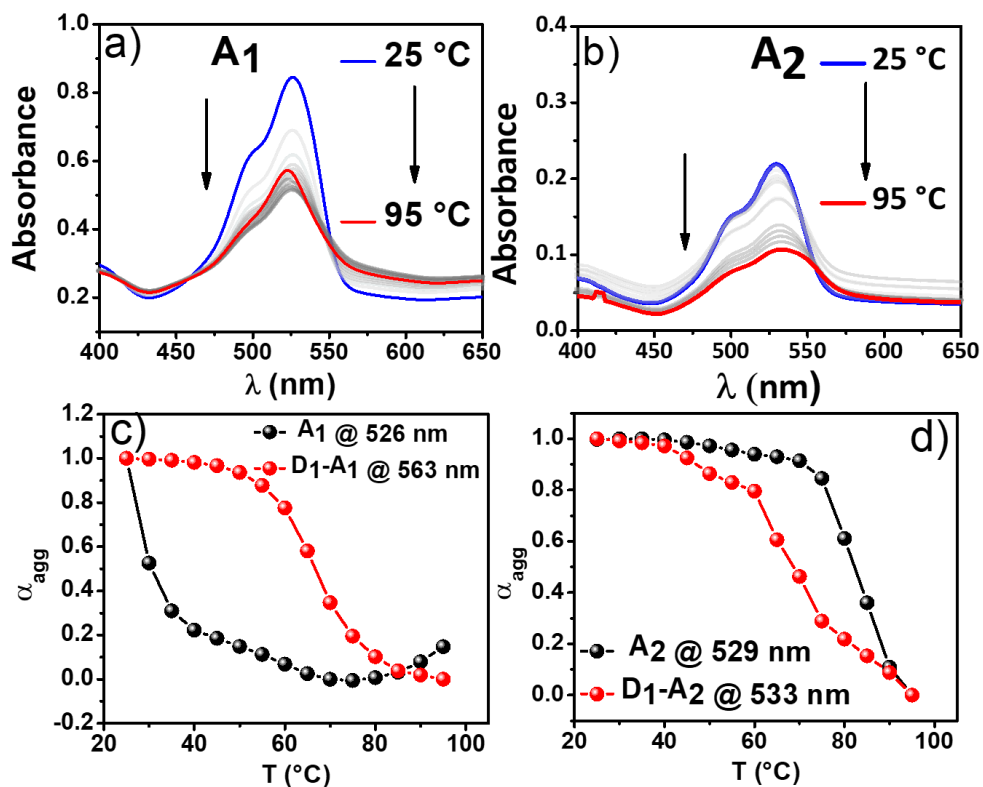

**Figure S5:** (a) Temperature-dependent UV-Vis absorption spectra of (a) **A1** in 10 mm path length cuvette and (b) **A2** in 2 mm path length cuvette; (c) Compared  $\alpha_{agg}$  vs. Temperature plot for (c) **A1** and **D1-A1** co-assembly, and (d) **A2** and **D1-A2** co-assembly.

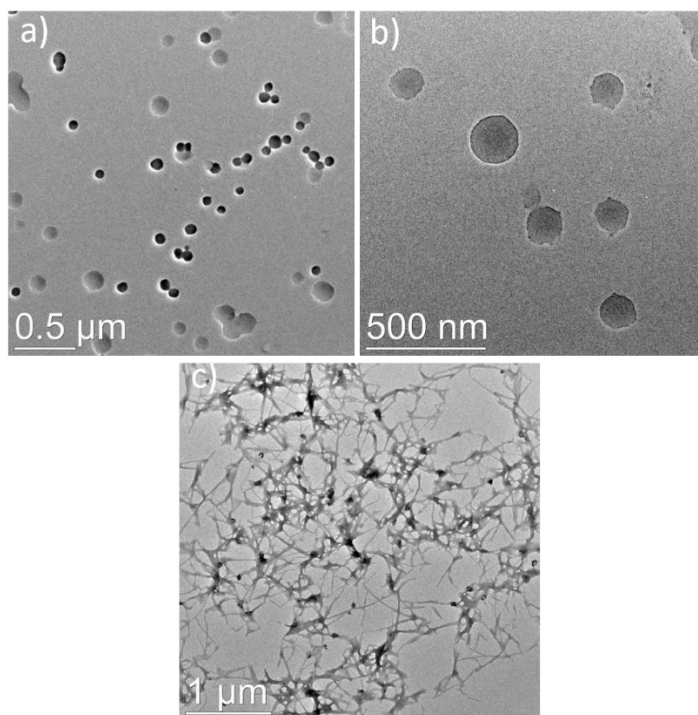

**Figure S6:** TEM images of (a) **A1**, (b) **A2** and (c) **D1-A2** in 10% MeOH-water.

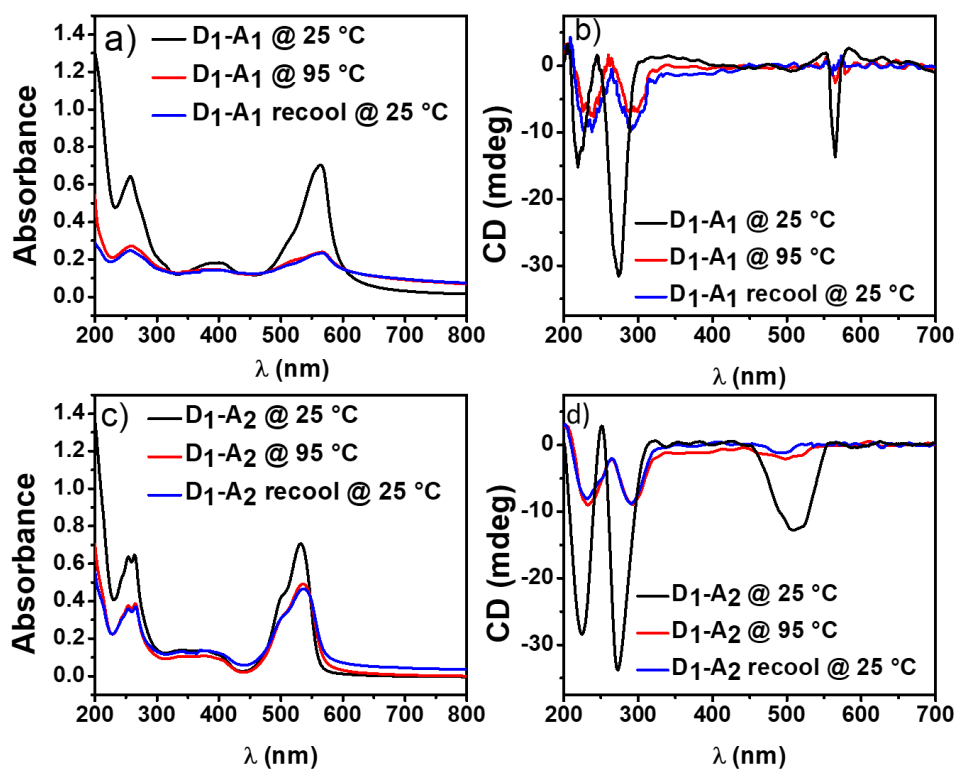

**Figure S7:** UV-Vis absorption spectra of co-assembled (a) **D<sub>1</sub>-A<sub>1</sub>** and (c) **D<sub>1</sub>-A<sub>2</sub>** under different conditions; CD spectra of co-assembled (b) **D<sub>1</sub>-A<sub>1</sub>** and (d) **D<sub>1</sub>-A<sub>2</sub>** under different conditions. Individual conc. = 0.1 mM in 10% MeOH-H<sub>2</sub>O. At 95 °C, the induced CD signal of the co-assembly disappeared, and that didn't regenerate after cooling back the sample to 25 °C.

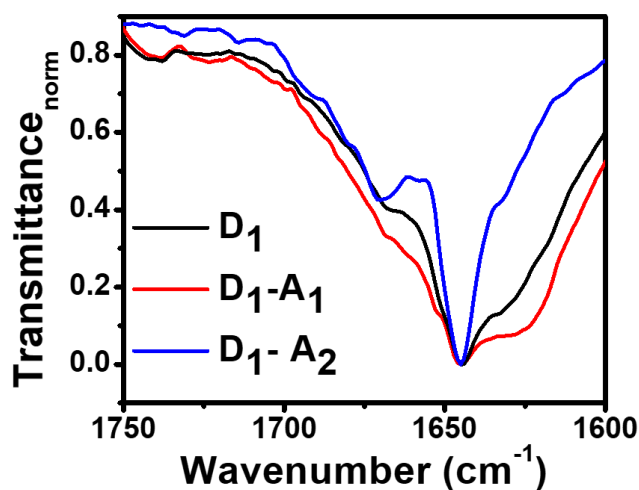

**Figure S8:** Compared FTIR spectra (showing the amide C=O stretching frequency region) of co-assembled **D<sub>1</sub>-A<sub>1</sub>** and **D<sub>1</sub>-A<sub>2</sub>** with **D<sub>1</sub>** in 10% MeOH/H<sub>2</sub>O.

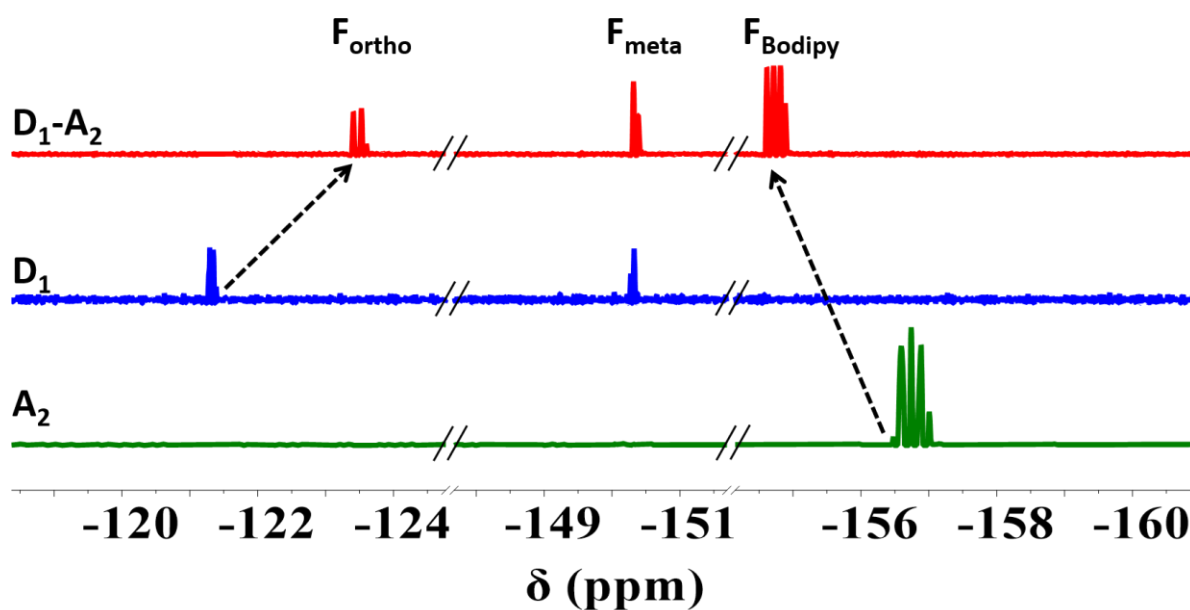

**Figure S9:**  $^{19}\text{F}$  NMR spectra of  $\text{A}_2$ ,  $\text{D}_1$ , and  $\text{D}_1\text{-A}_2$  in 10% MeOH-water.  $\text{D}_2\text{O}$  was used as a locking solvent. Ortho- and meta-fluorine atoms (with respect to iodine) of peptide  $\text{D}_1$  showed an upfield shift, and BODIPY fluorine atoms showed a downfield shift upon halogen bonding with  $\text{A}_2$  in the co-assembled state.

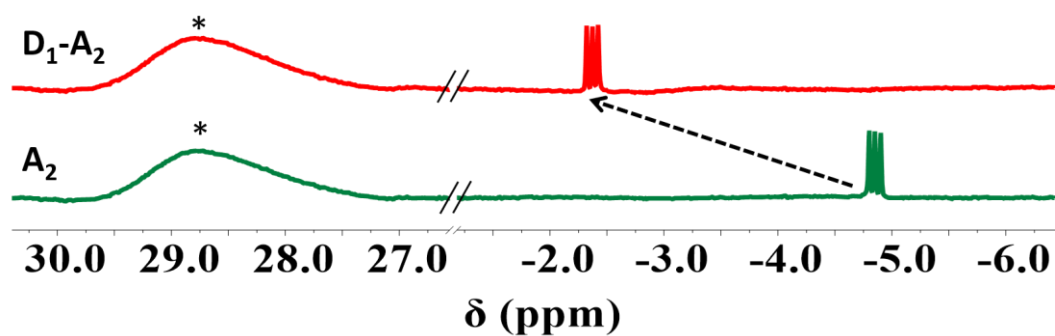

**Figure S10:**  $^{11}\text{B}$  NMR spectra of  $\text{A}_2$  and co-assembled  $\text{D}_1\text{-A}_2$  in 10% MeOH/water.  $\text{D}_2\text{O}$  was used as a locking solvent and phenylboronic acid as an internal standard.  $\text{A}_2$  boron atom experienced a significant downfield shift upon halogen bonding with  $\text{D}_1$  in the co-assembly.

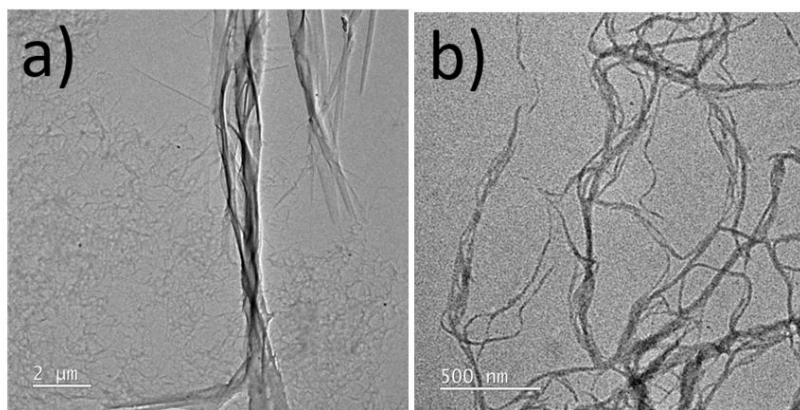

**Figure S11:** TEM images of self-assembled  $D_2$  in 10% MeOH/water mixture.

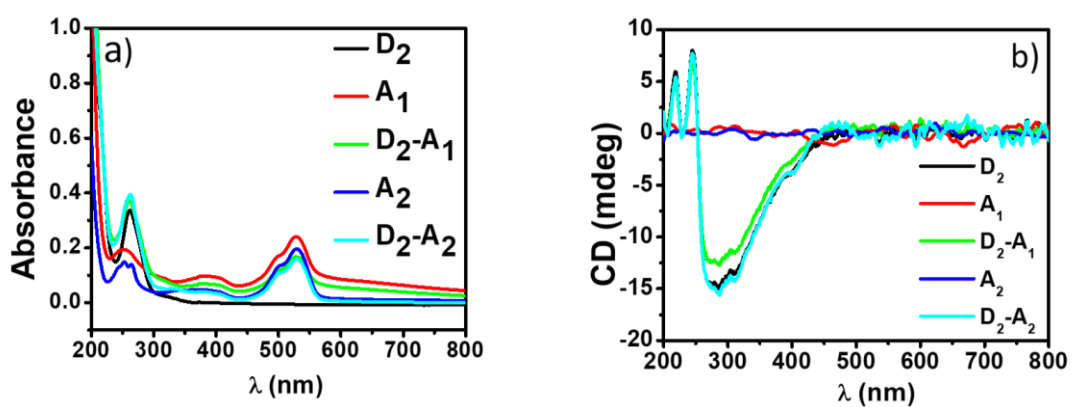

**Figure S12:** (a) UV-Vis spectra and (b) CD spectra of  $A_1$ ,  $A_2$ ,  $D_2$  and their 1:1 mixtures ( $D_2-A_1$  and  $D_2-A_2$ ) in a 10% MeOH/ $H_2O$ . No induced CD signals for  $A_1$  or  $A_2$  appeared in the presence of the control peptide  $D_2$  lacking a halogen bond-donating iodine atom.

## NMR and Mass Spectra

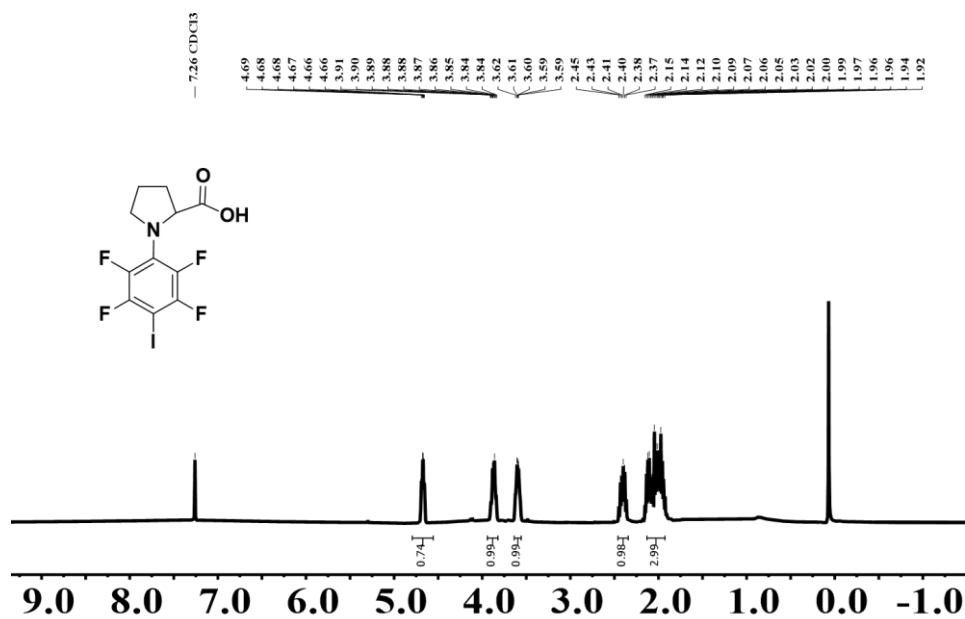

$^1\text{H}$  NMR spectrum of compound **Pro-I** in  $\text{CDCl}_3$ .

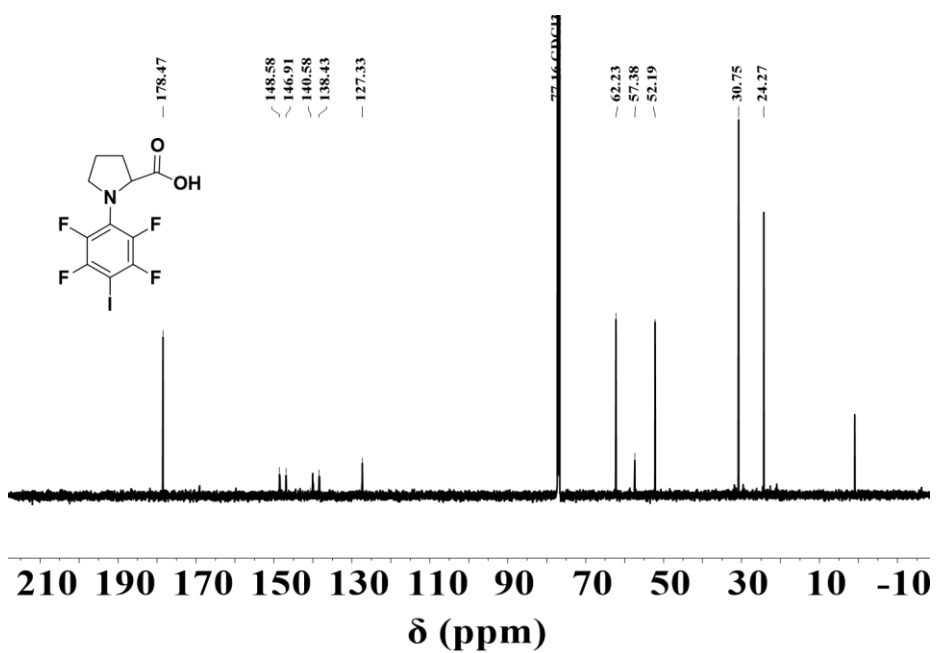

$^{13}\text{C}$  NMR spectrum of the compound **Pro-I** in  $\text{CDCl}_3$ .

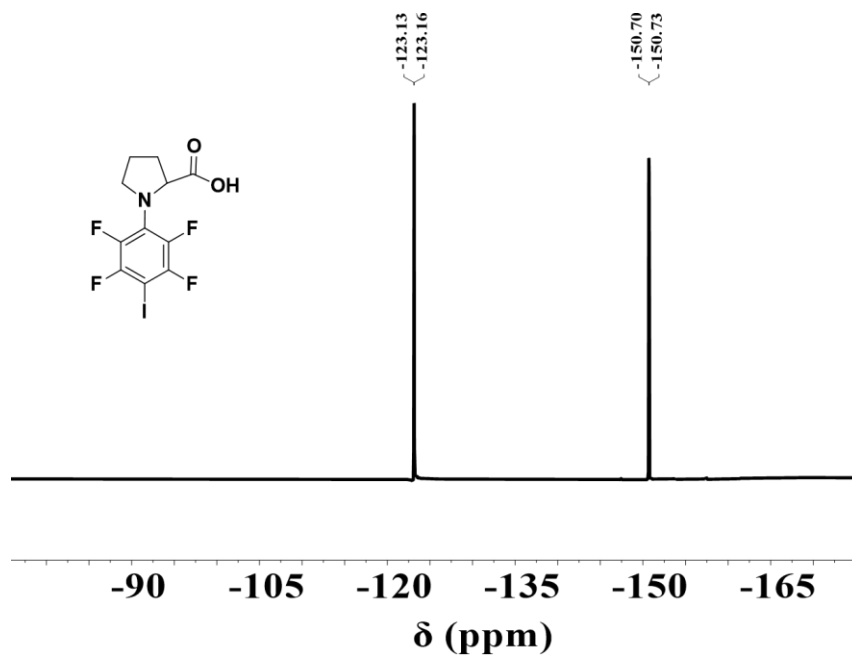

$^{19}\text{F}$  NMR spectrum of compound **Pro-I** in  $\text{CDCl}_3$ .

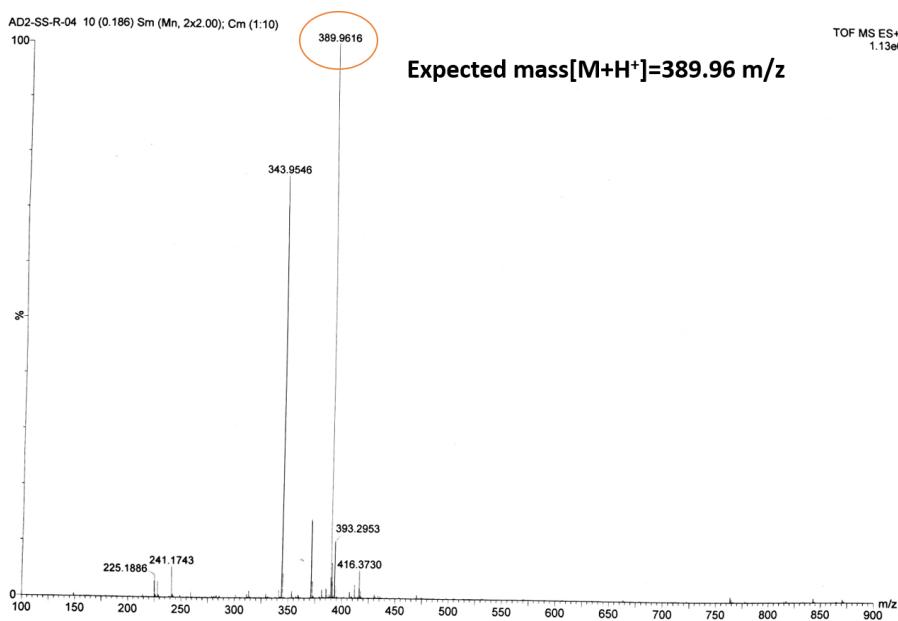

HRMS spectrum of the compound **Pro-I**.



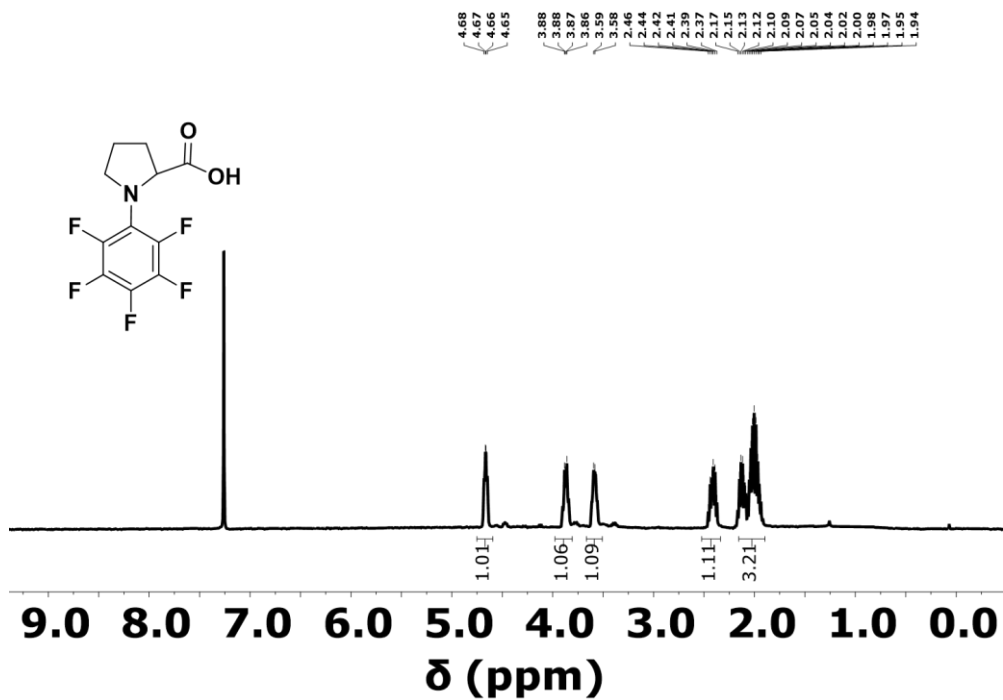

$^1\text{H}$  NMR spectrum of the compound **Pro-F** in  $\text{CDCl}_3$ .

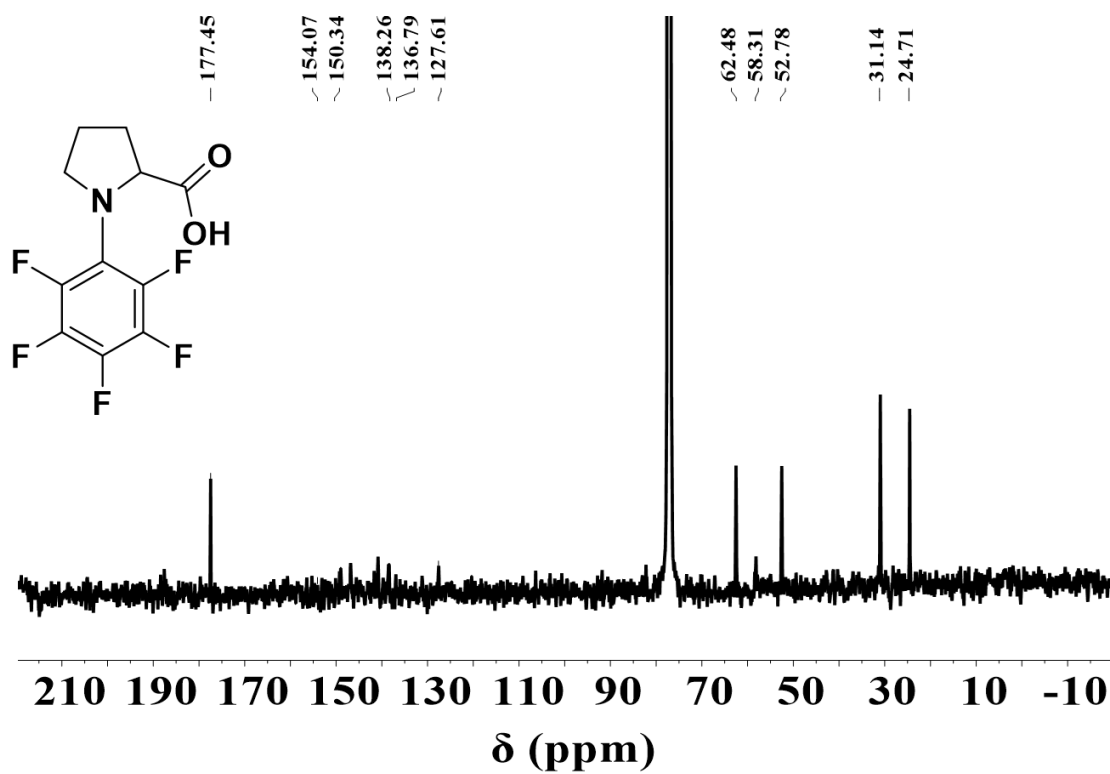

$^{13}\text{C}$  NMR spectrum of the compound **Pro-F** in  $\text{CDCl}_3$ .

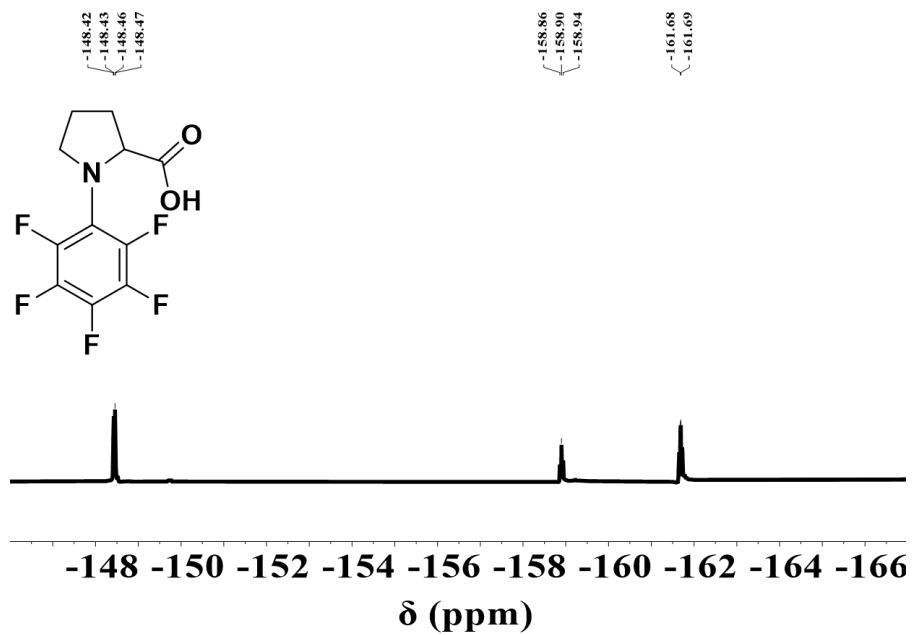

$^{19}\text{F}$  NMR spectrum of compound **Pro-F** in  $\text{CDCl}_3$ .

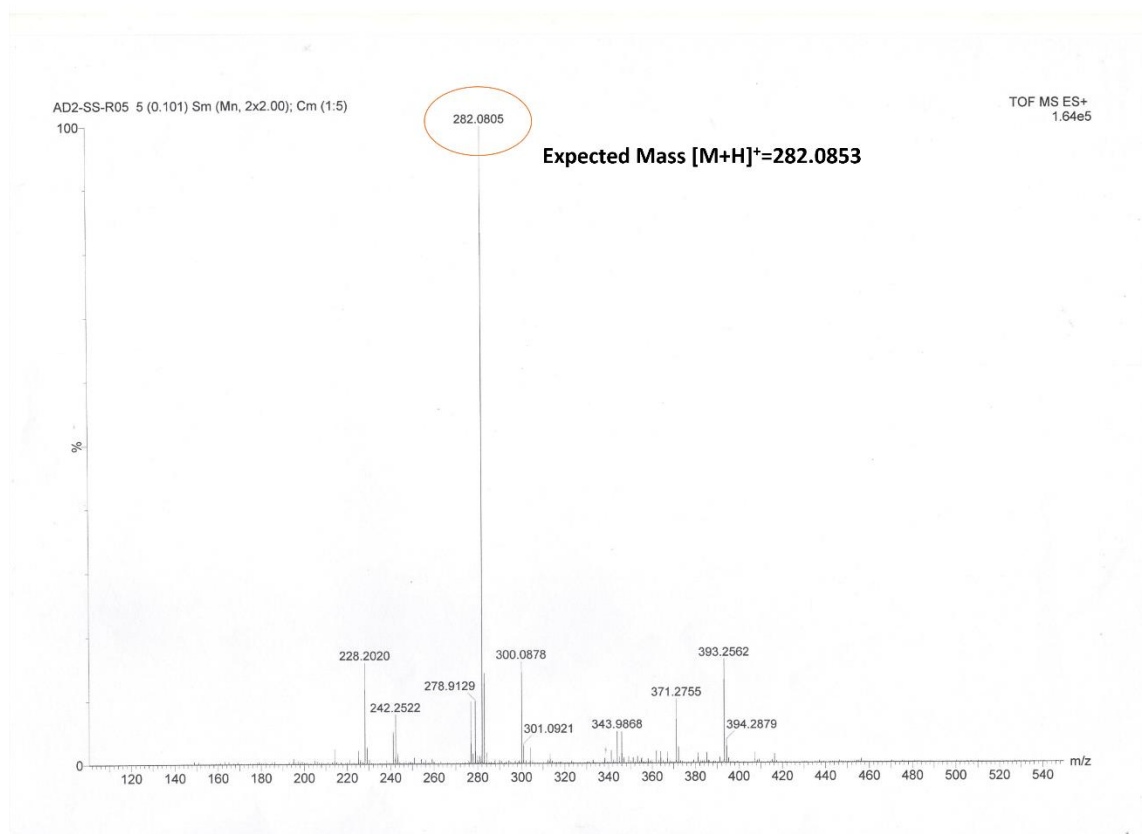

HRMS spectrum of the compound **Pro-F**.

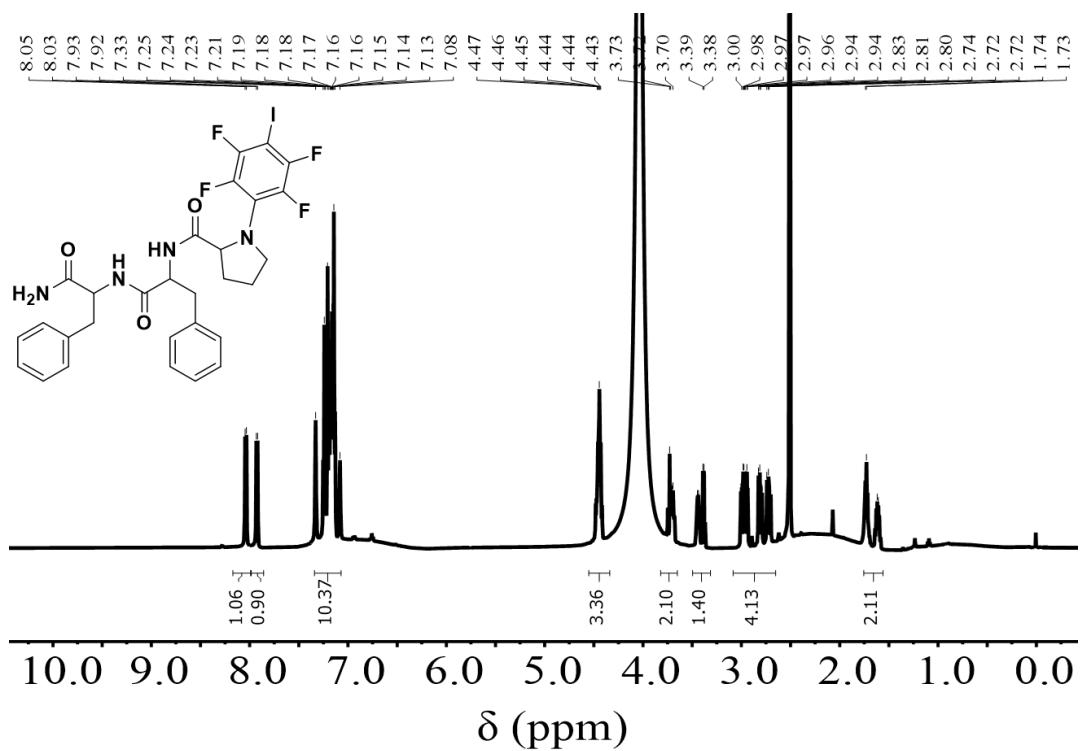

$^1\text{H}$  NMR spectrum of peptide **D1** in  $\text{DMSO-d}_6$ .

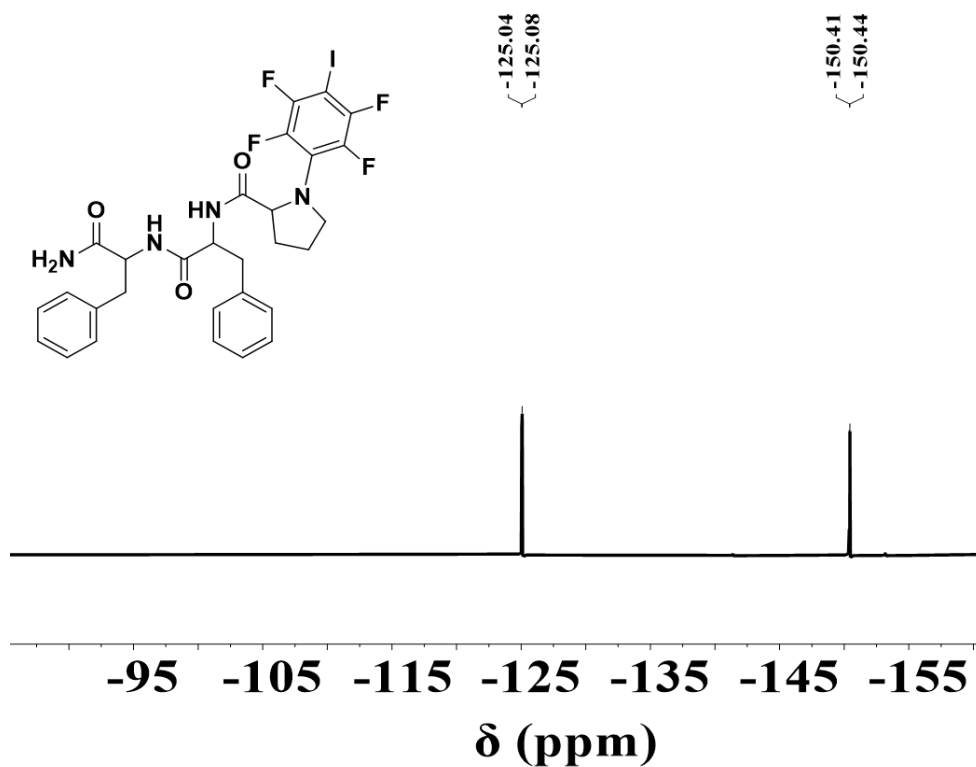

$^{19}\text{F}$  NMR spectrum of peptide **D1** in  $\text{DMSO-d}_6$ .

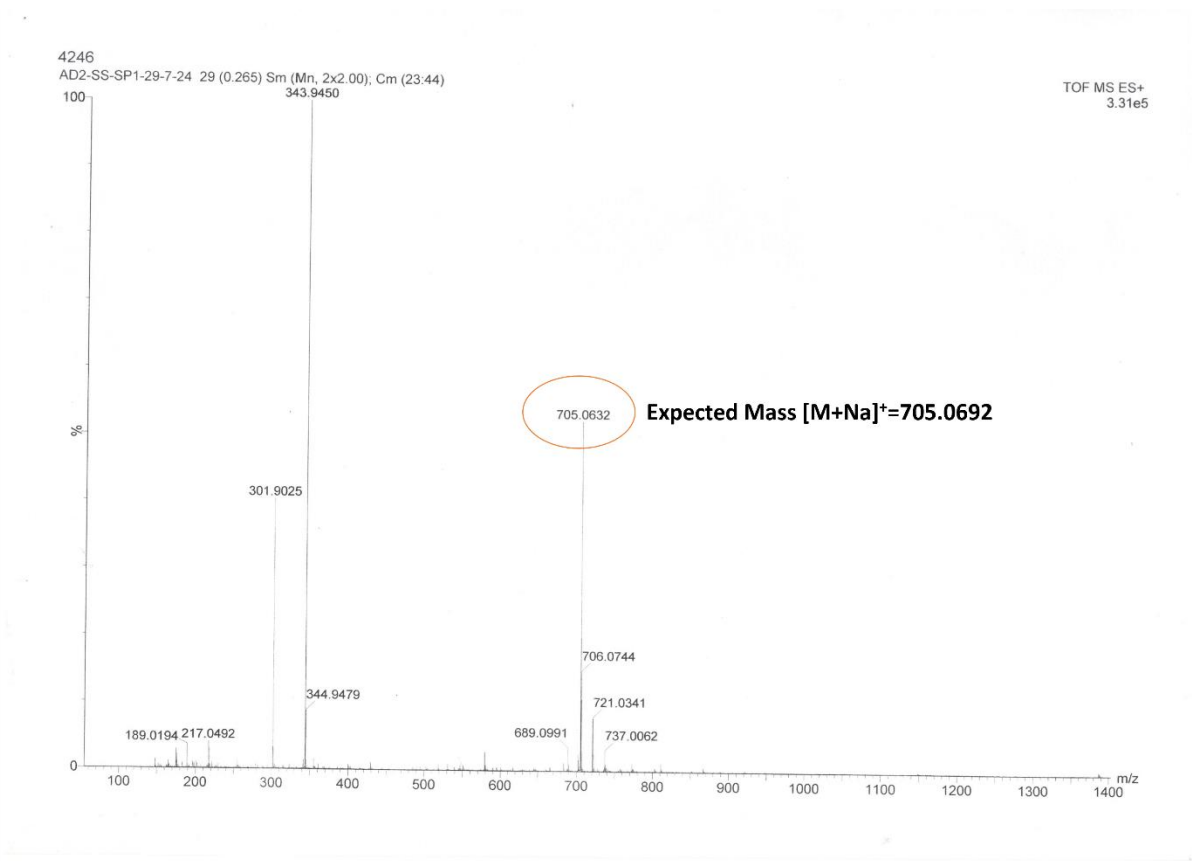

HRMS spectrum of peptide **D<sub>1</sub>**.

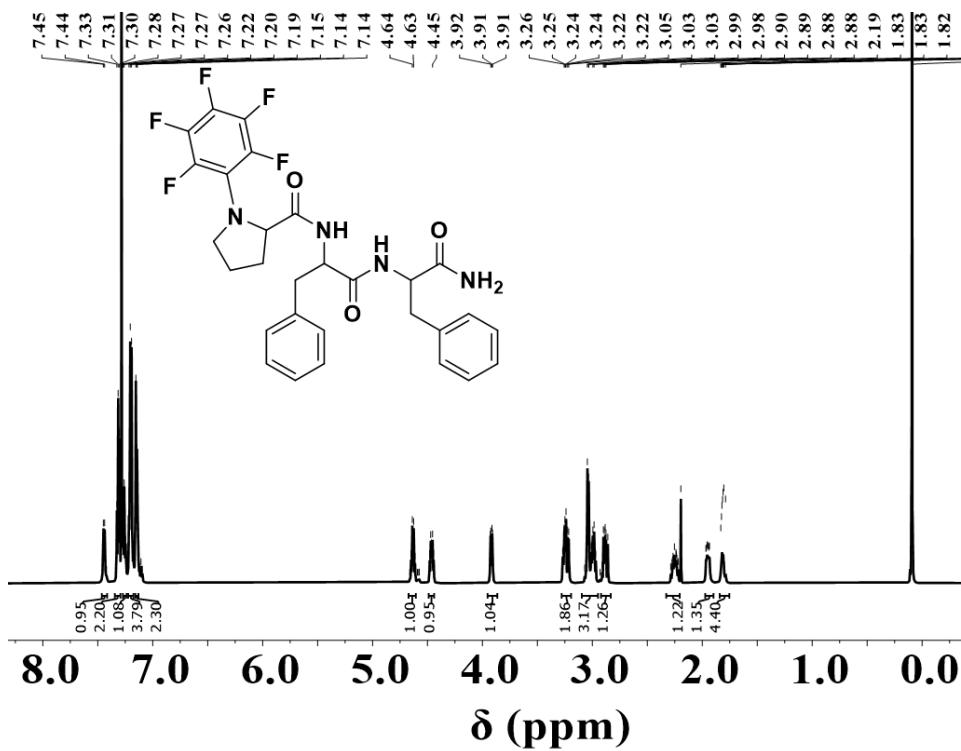

$^1\text{H}$  NMR spectrum of peptide **D<sub>2</sub>** in  $\text{CDCl}_3$

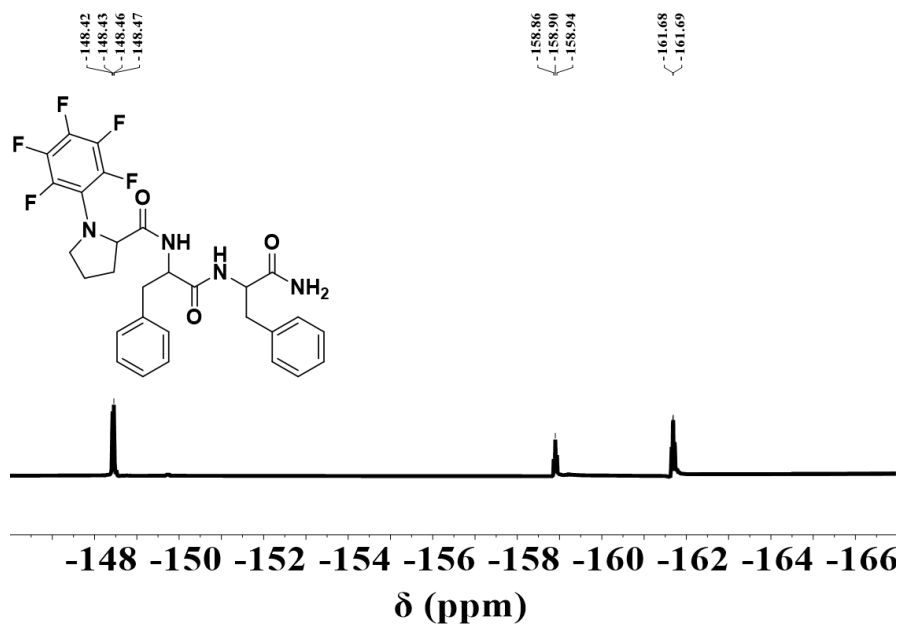

<sup>19</sup>F NMR spectrum of peptide **D<sub>2</sub>** in CDCl<sub>3</sub>.

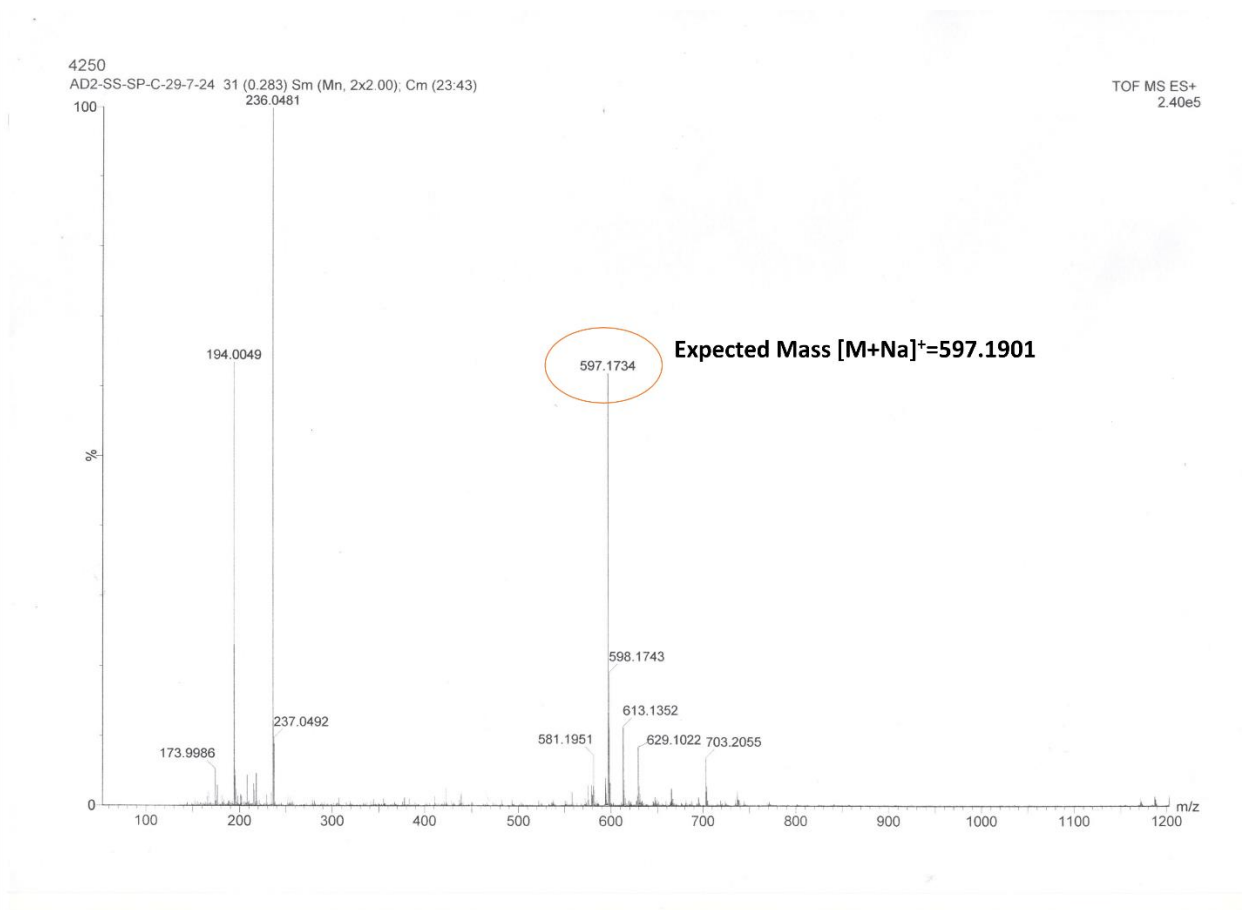

HRMS spectrum of peptide **D<sub>2</sub>**.

## References:

- 1 John. Olmsted, *J. Phys. Chem.*, 1979, **83**, 2581–2584.
- 2 G. Ulrich and R. Ziessel, *J. Org. Chem.*, 2004, **69**, 2070–2083.
- 3 a) R. Ziessel, L. Bonardi, P. Retailleau and G. Ulrich, *J. Org. Chem.*, 2006, **71**, 3093–3102.  
b) N. Chaudhary, K. Gill, M. Pahuja, S. Rani, S. Das, M. K. Choudhary, S. A. Siddiqui, D. Rani, M. Afshan, R. Ghosh, S. Riyajuddin, S. Mula and K. Ghosh, *J. Alloys Compd.*, 2024, **978**, 173389.
- 4 K.-Y. Chu and A. R. Thompson, *J. Chem. Eng. Data*, 1962, **7**, 358–360.
- 5 S. Gorai, R. Agrawal, R. Ghosh and S. Mula, *Chem. – Eur. J.*, 2024, doi.org/10.1002/chem.202402669.
- 6 A. Jamadar, C. Kumar Karan, S. Biswas, and A. Das, *CrystEngComm*, 2021, **23**, 1695.
- 7 G. Ghosh, R. Barman, J. Sarkar and S. Ghosh, *J. Phys. Chem. B*, 2019, **123**, 5909.
